# Supplementary figures and images for: Quantitative and functional interrogation of parent-of-origin allelic expression biases in the brain
Source: eLife journal article supplement (doi:10.7554/elife.07860), 2015-07-03

ENSMUST00000024599.7

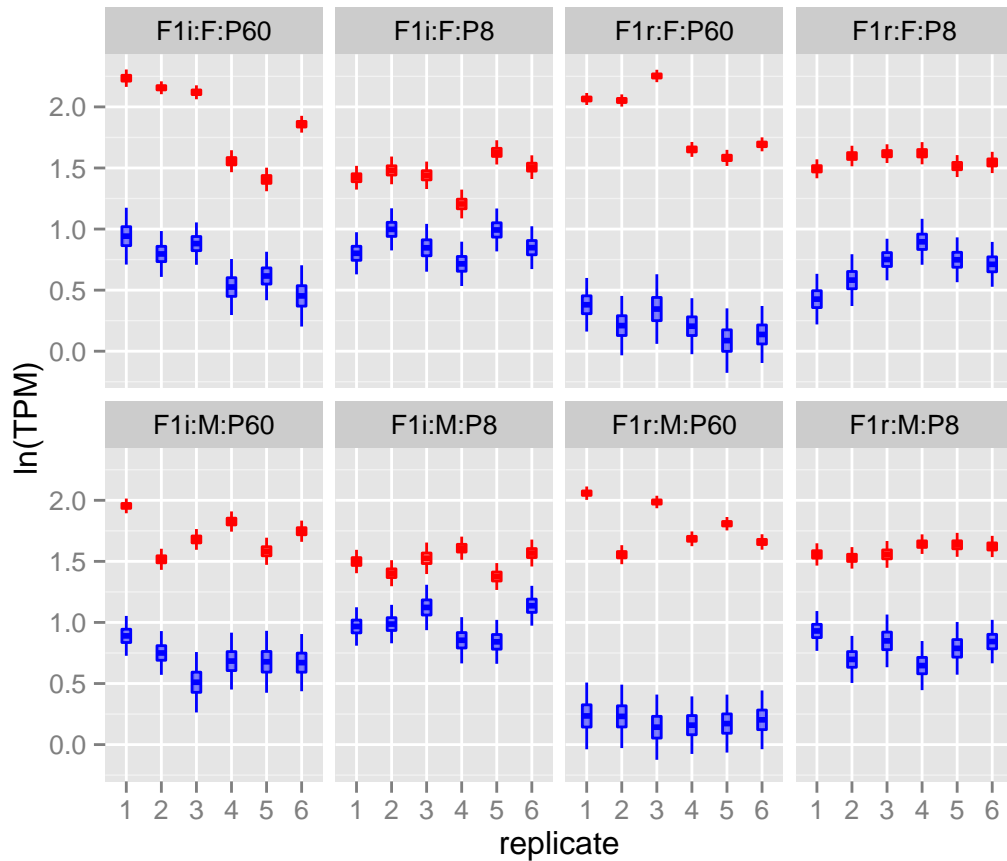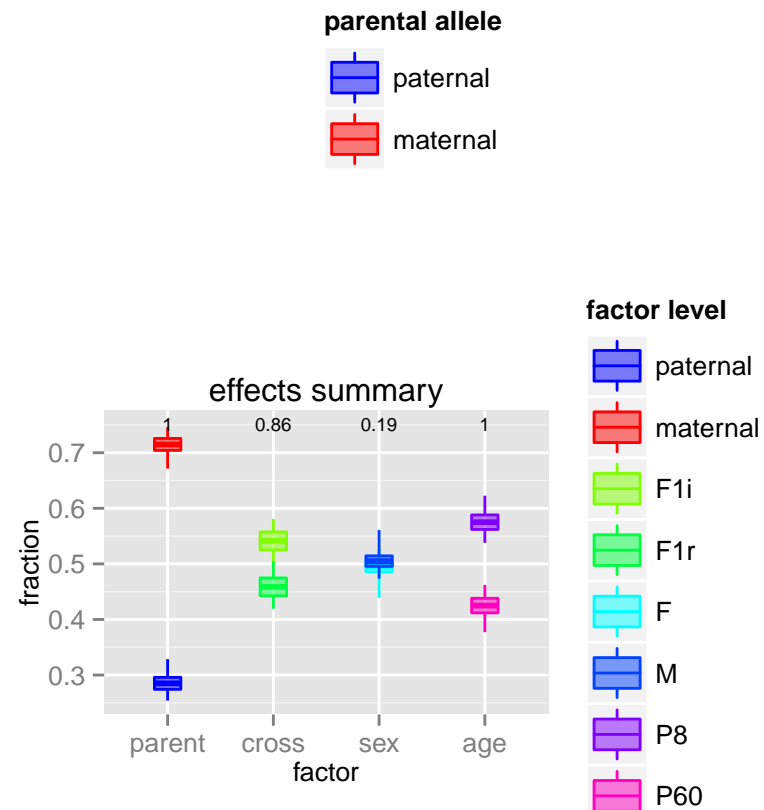

Supplement: supp [file ENSMUST00000024599.7.pdf › braimCode/ENSMUST00000024599.7.pdf]

ENSMUST00000125366.1

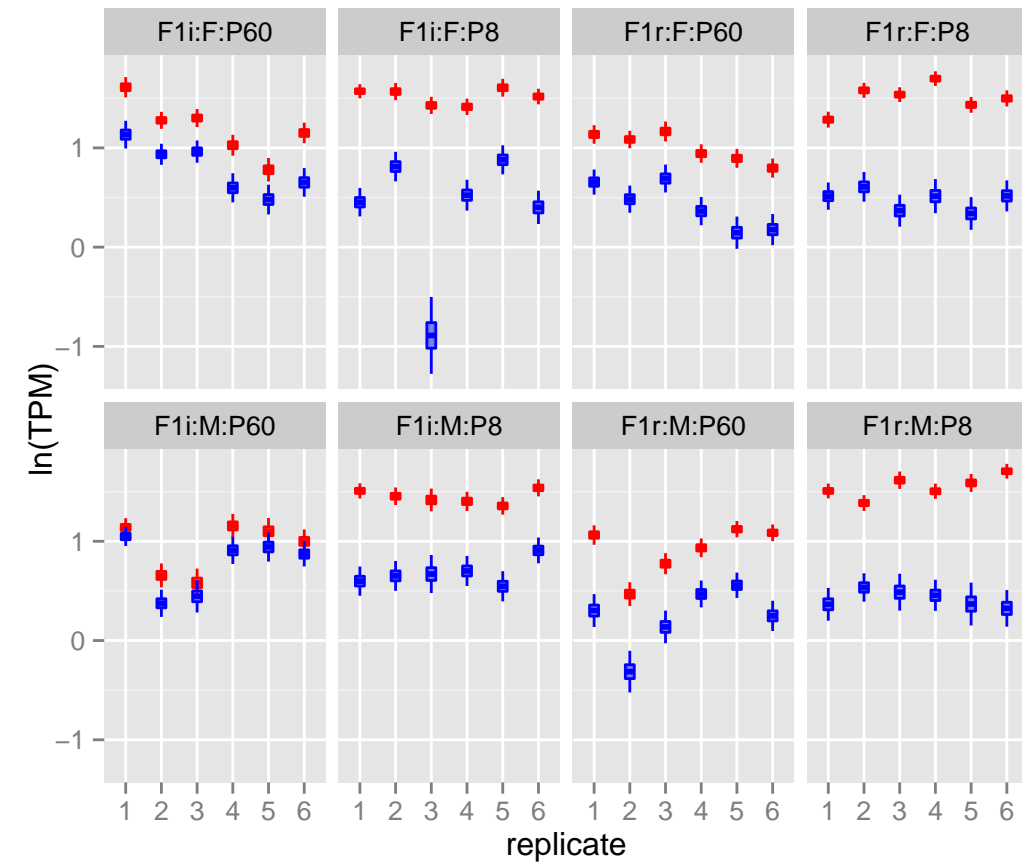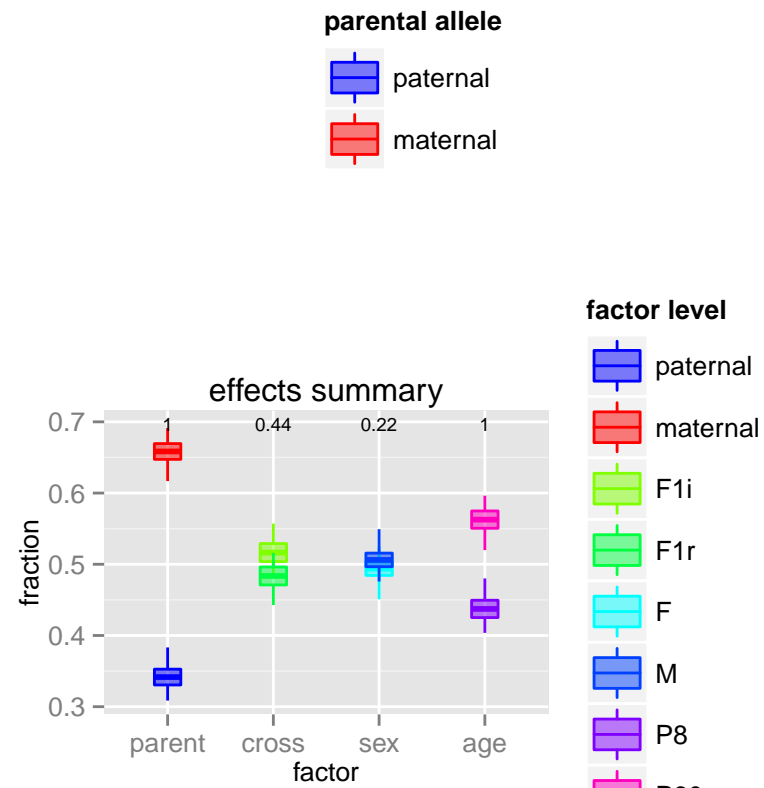

Supplement: supp [file ENSMUST00000125366.1.pdf › braimCode/ENSMUST00000125366.1.pdf]

Figure 1 – figure supplement 1

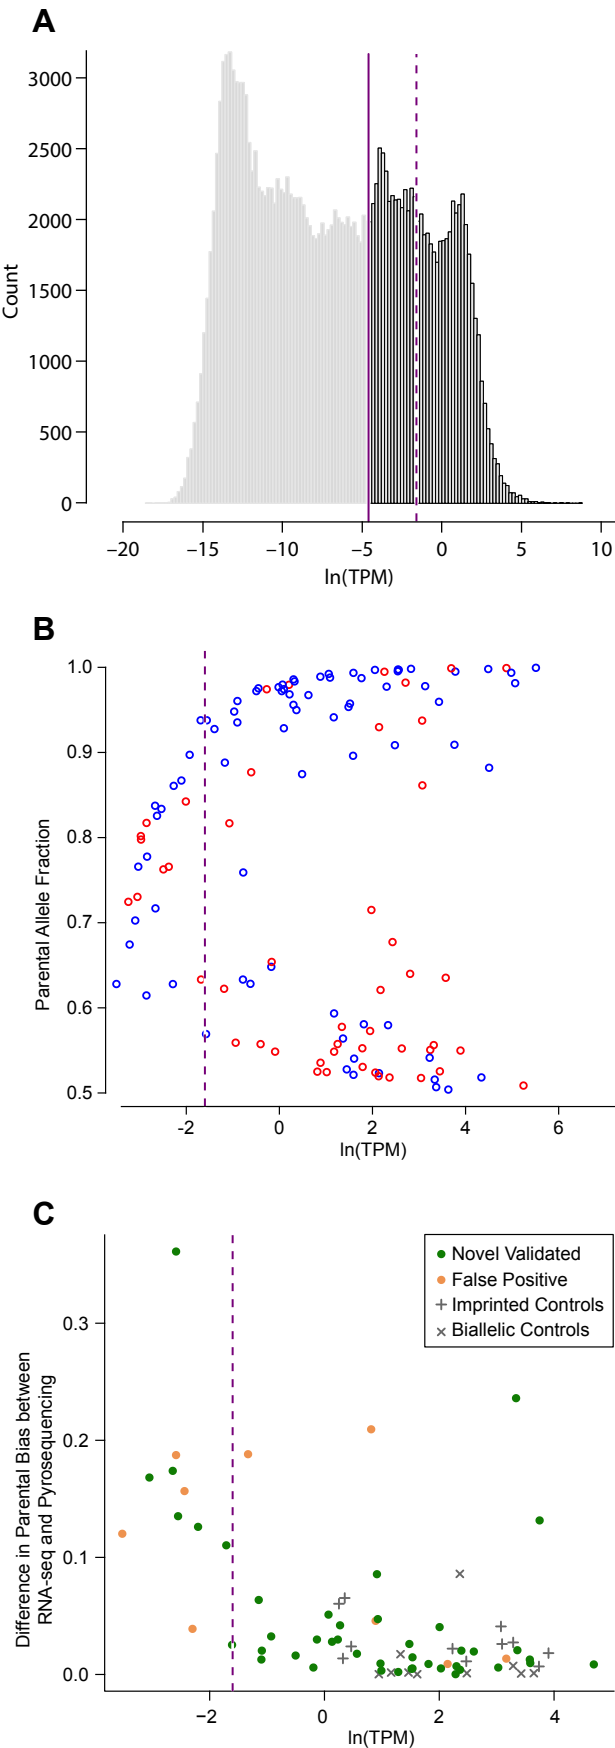

Supplement: supp [file elife_poa_e07860_Figure_1_figure_supplement_1.pdf › elife_poa_e07860_Figure_1_figure_supplement_1.pdf]

Figure 4 – figure supplement 1

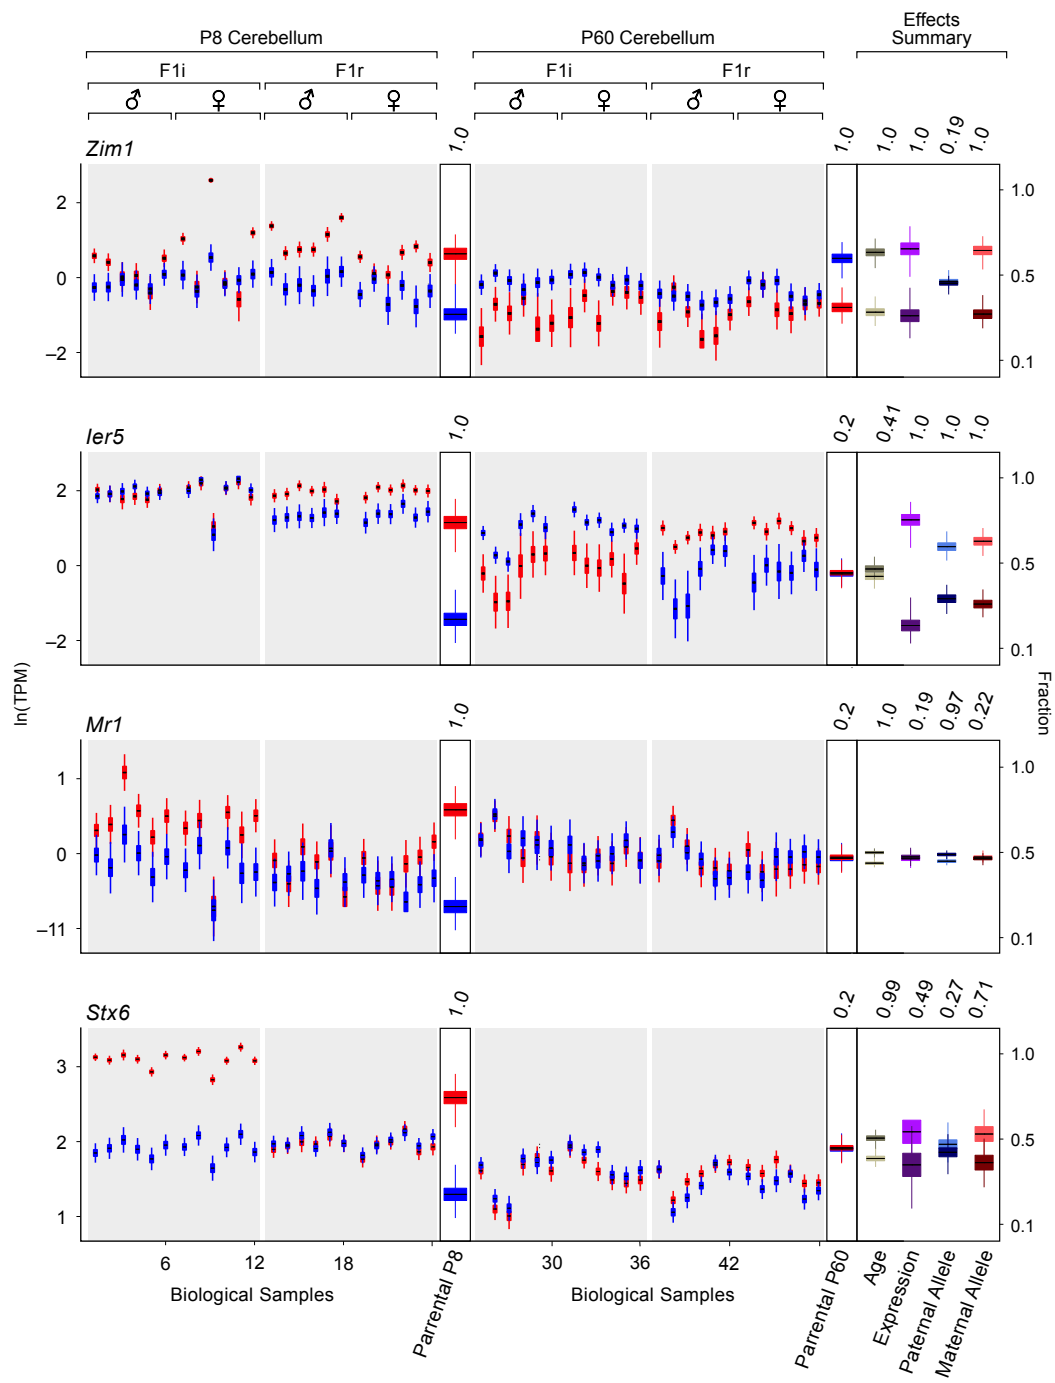

Supplement: supp [file elife_poa_e07860_Figure_4_figure_supplement_1.pdf › elife_poa_e07860_Figure_4_figure_supplement_1.pdf]

Figure 4 – figure supplement 2

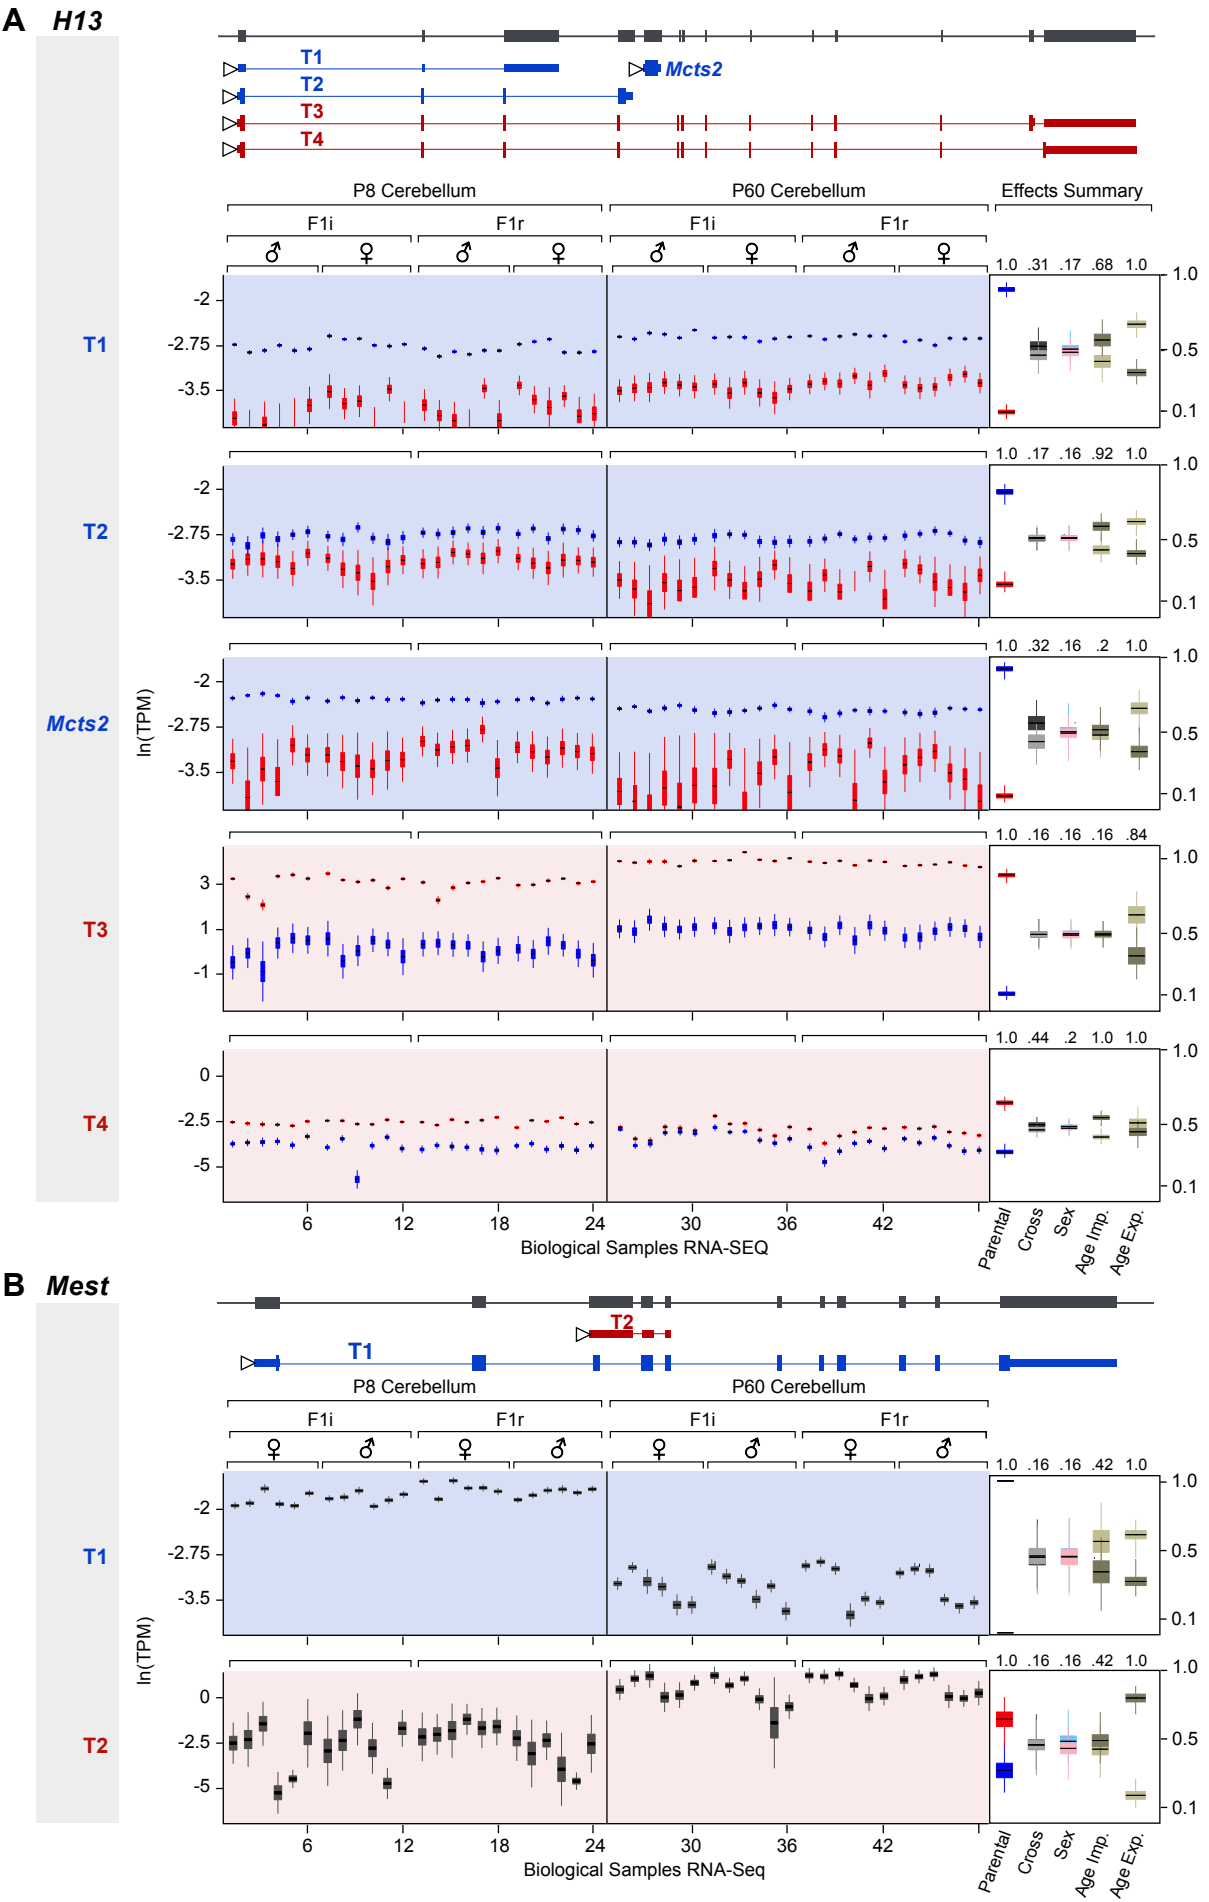

Supplement: supp [file elife_poa_e07860_Figure_4_figure_supplement_2.pdf › elife_poa_e07860_Figure_4_figure_supplement_2.pdf]

Figure 6 – figure supplement 1

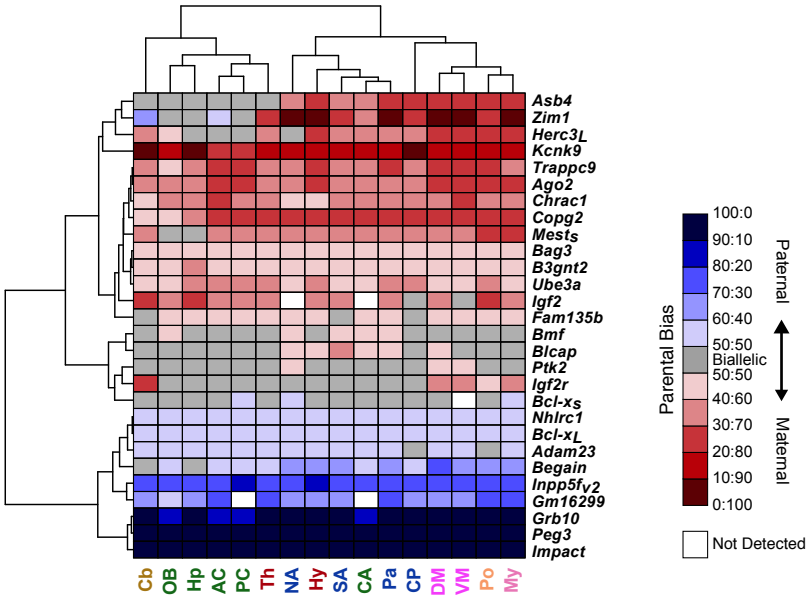

Supplement: supp [file elife_poa_e07860_Figure_6_figure_supplement_1.pdf › elife_poa_e07860_Figure_6_figure_supplement_1.pdf]

Figure 6 – figure supplement 2

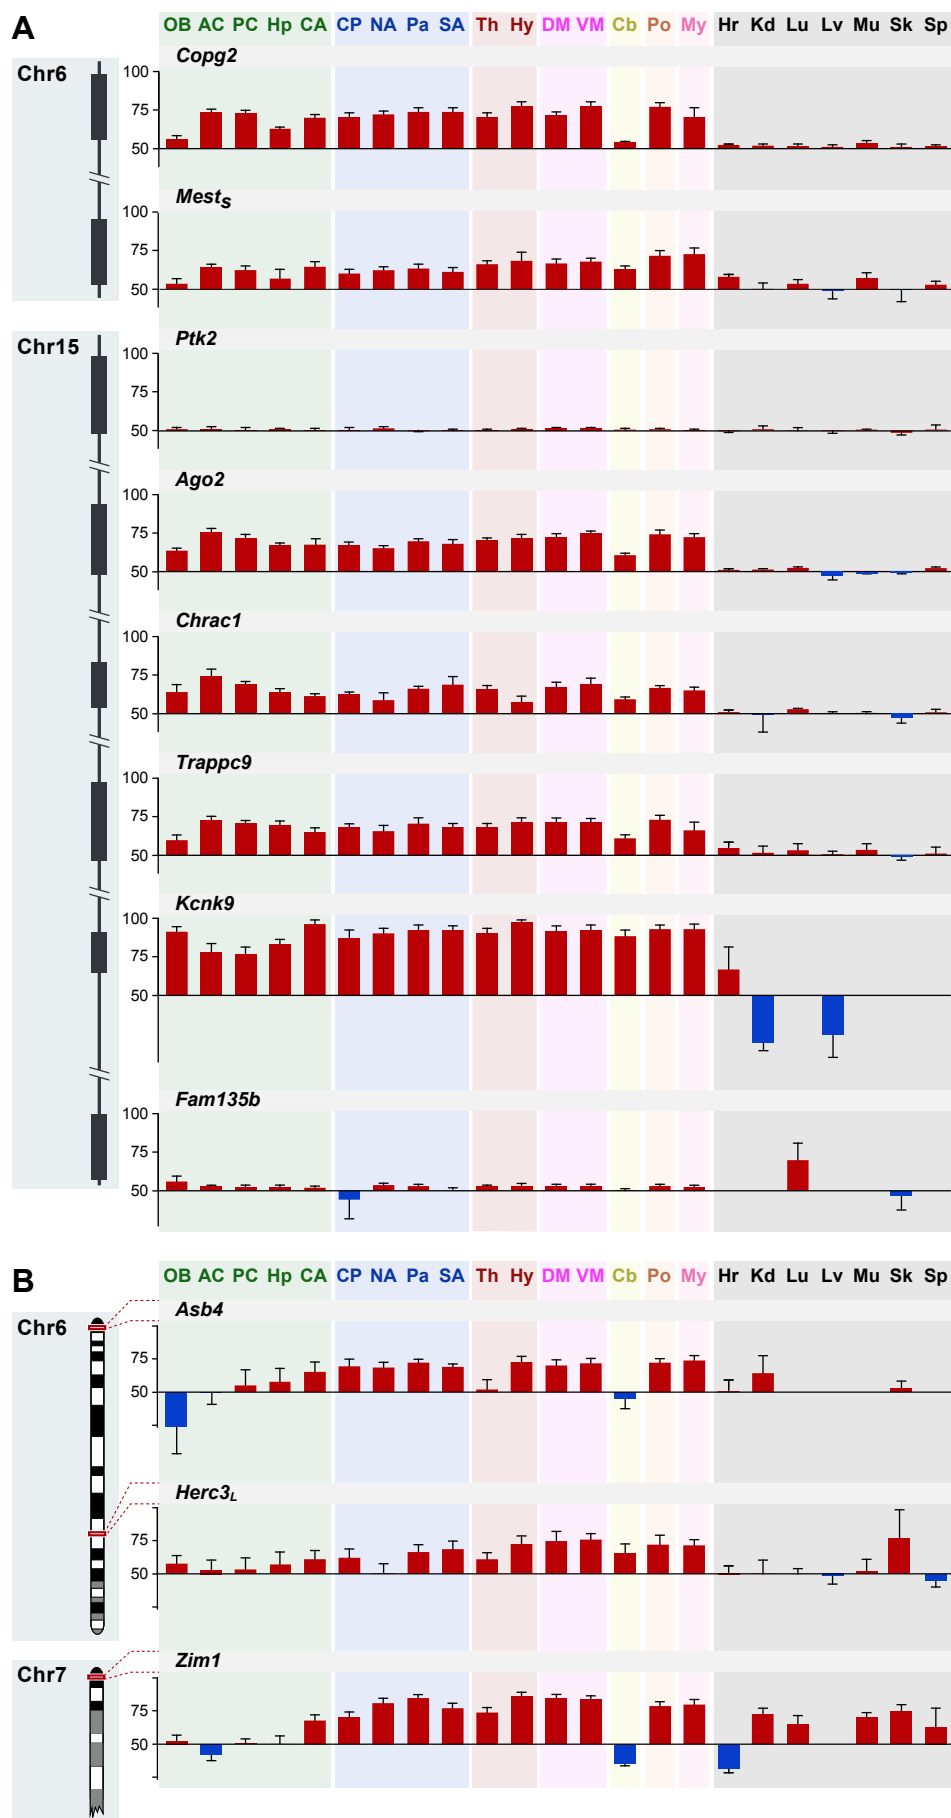

Supplement: supp [file elife_poa_e07860_Figure_6_figure_supplement_2.pdf › elife_poa_e07860_Figure_6_figure_supplement_2.pdf]

Figure 8 – figure supplement 1

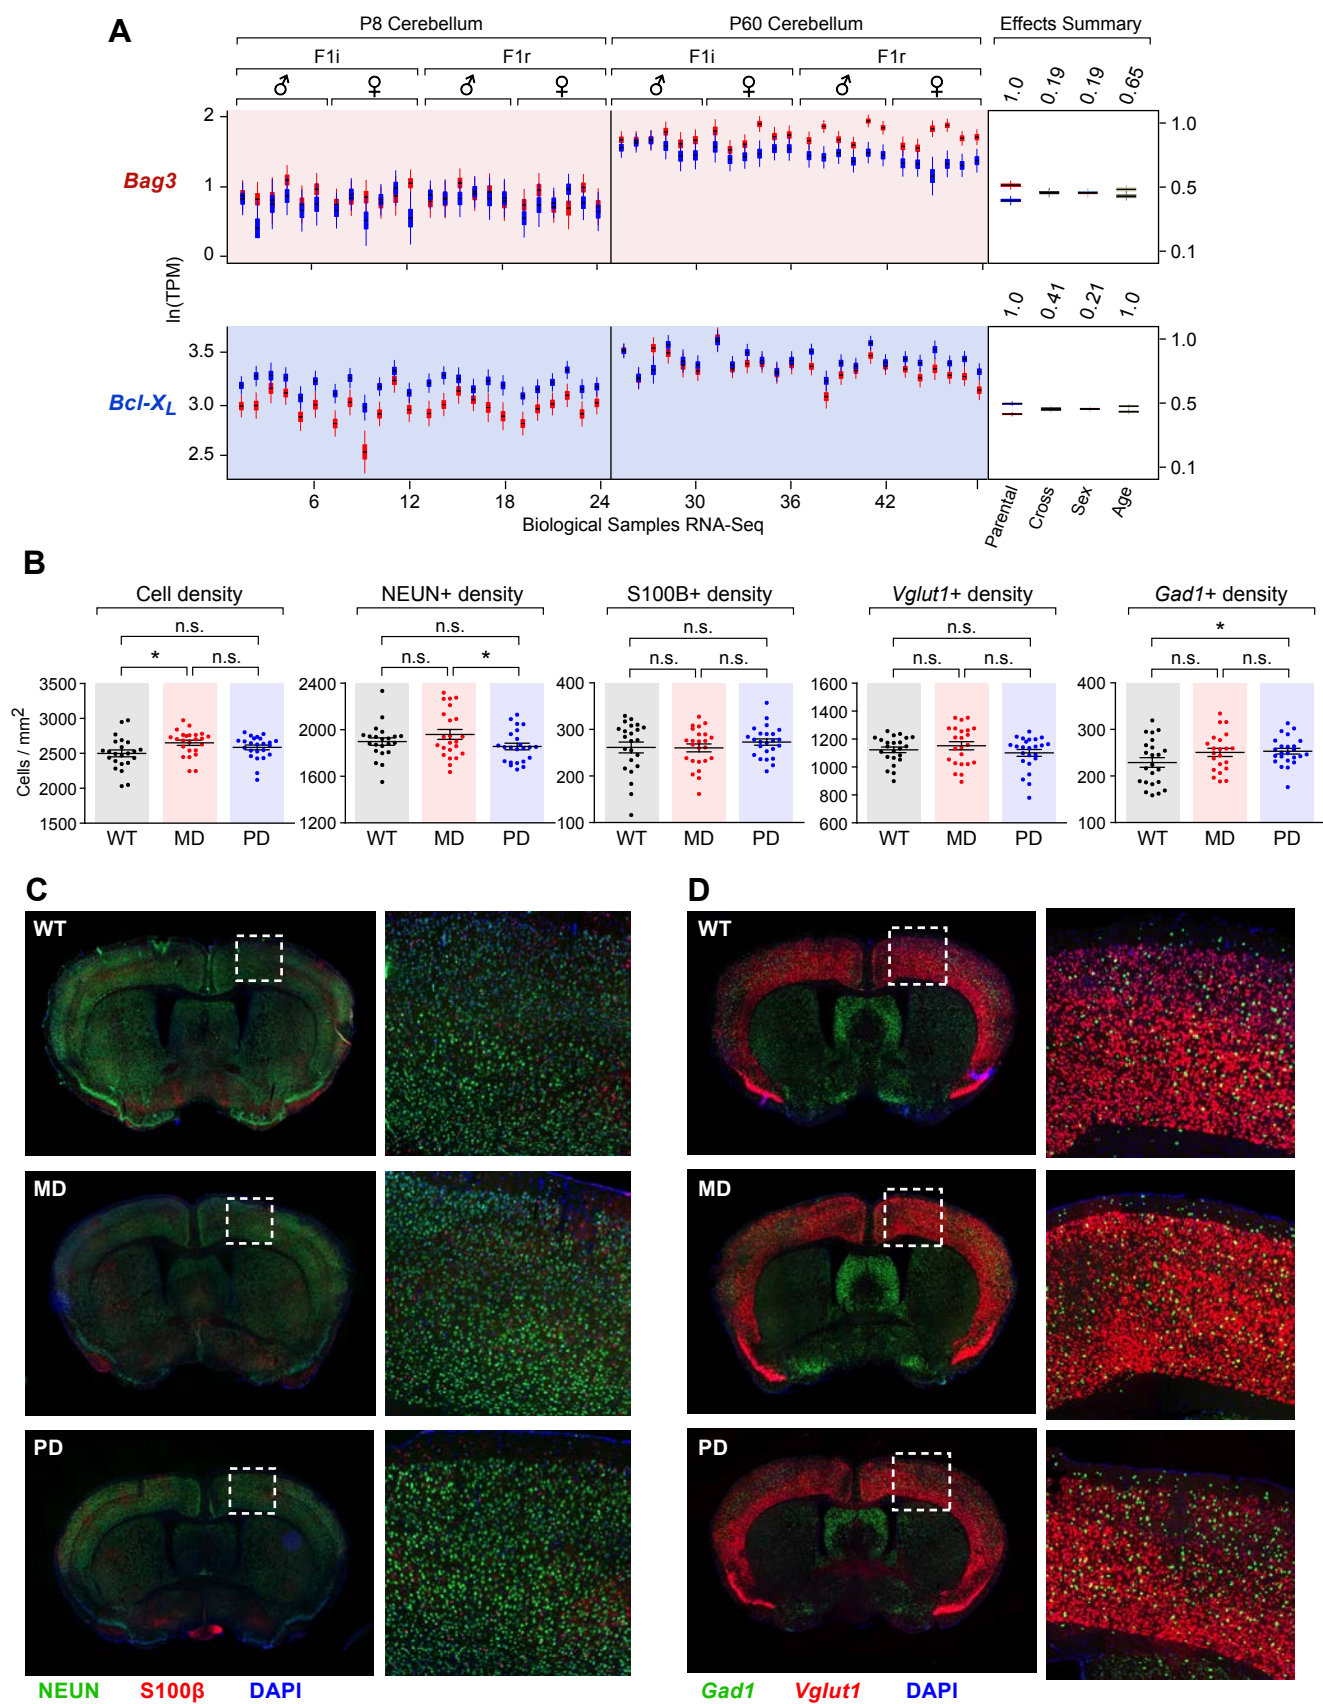

Supplement: supp [file elife_poa_e07860_Figure_8_figure_supplement_1.pdf › elife_poa_e07860_Figure_8_figure_supplement_1.pdf]

Figure 8 – figure supplement 2

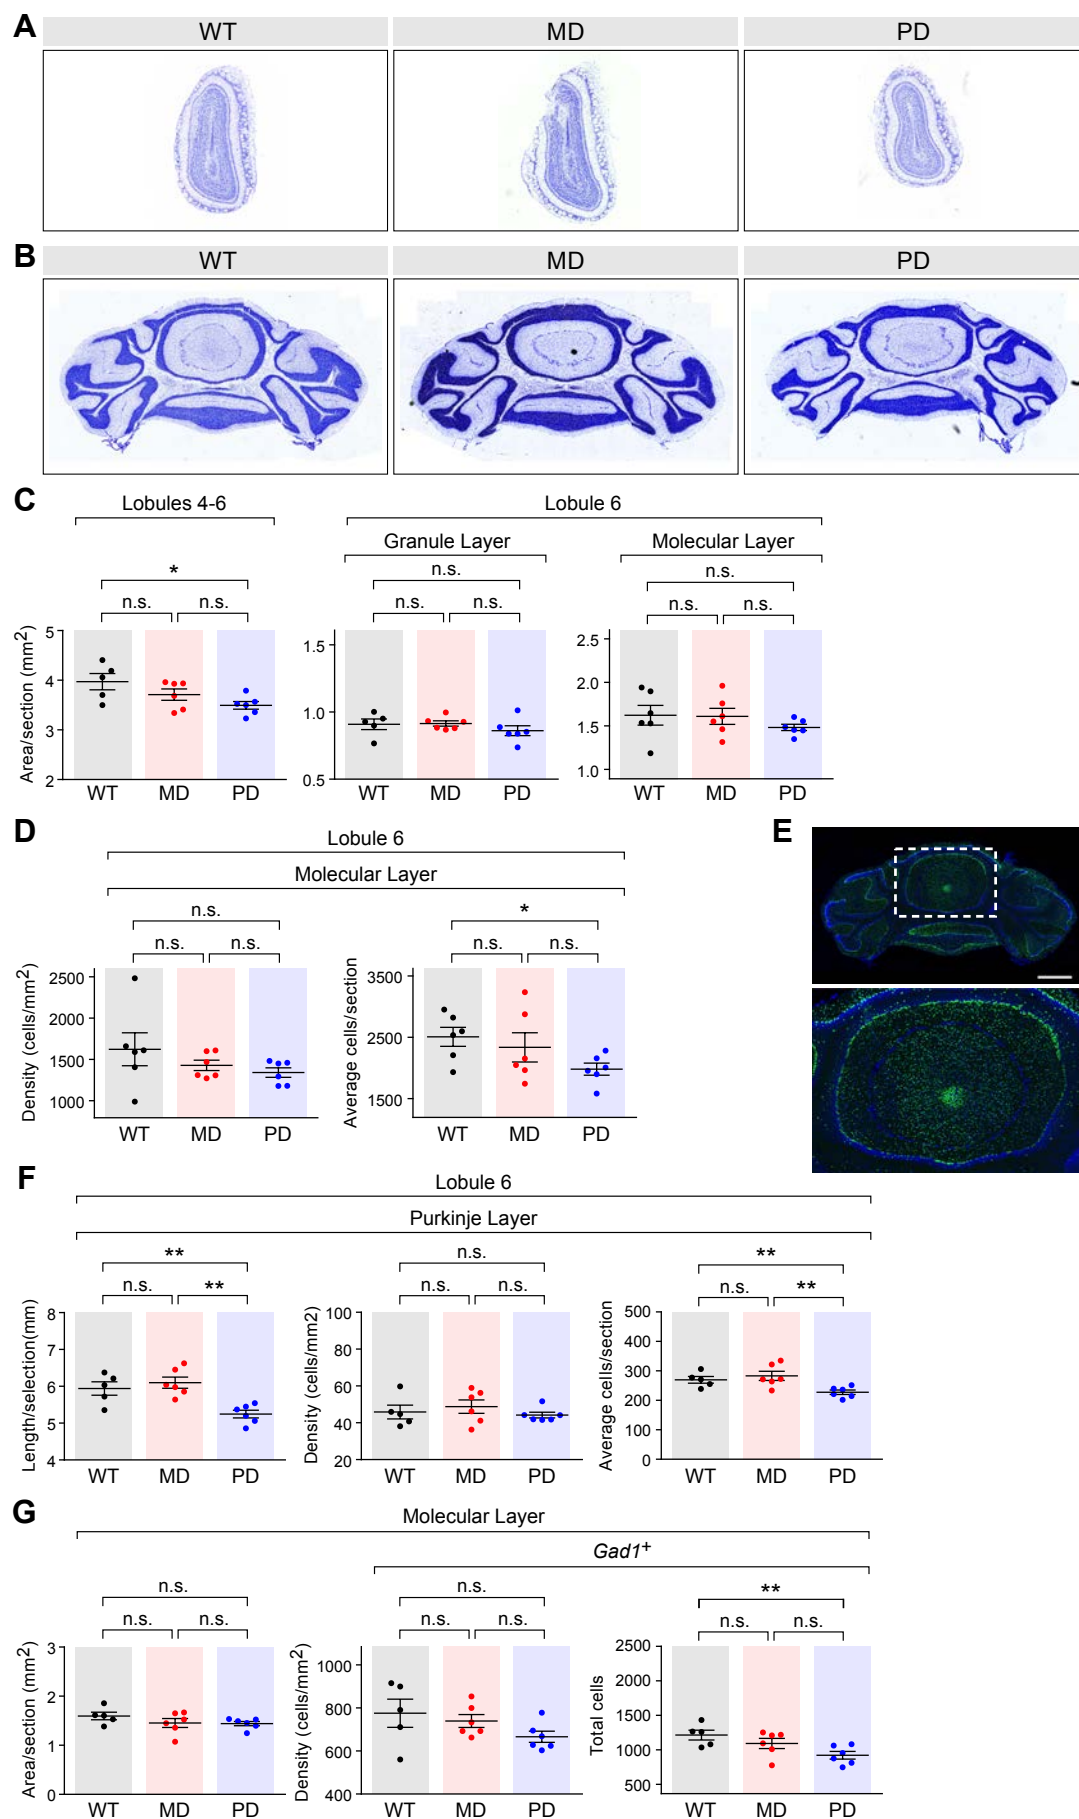

Supplement: supp [file elife_poa_e07860_Figure_8_figure_supplement_2.pdf › elife_poa_e07860_Figure_8_figure_supplement_2.pdf]
